# Supplementary material
Source: PubMed Central journal article supplement (PMC7611720)
Supplement: EMS132483-supplement-Supplementary_Tables.pdf [file EMS132483-supplement-Supplementary_Tables.pdf]

**Supplementary Tables 1-3****Supplementary Table 1. ICD-10 diagnostic codes used for outcomes, exclusions, and propensity score matching of cohorts**

| <b>Category</b>                                         | <b>ICD-10 code(s)</b>              | <b>Main sub-categories</b>                                 |
|---------------------------------------------------------|------------------------------------|------------------------------------------------------------|
| <b><i>Outcomes of interest</i></b>                      |                                    |                                                            |
| Dementia                                                | F01-F03, G30, G31.0, G31.2, G31.83 | F01 (vascular dementia), G30 (Alzheimer's disease)         |
| Movement disorders                                      | G20-G26                            | G20 (Parkinson's disease)                                  |
| Mild cognitive impairment                               | G31.84                             |                                                            |
| Cerebrovascular disease                                 | I60-I69                            | I63 (stroke), I60-I62 (cerebral haemorrhage)               |
| <b><i>Additional diagnoses excluded at baseline</i></b> |                                    |                                                            |
| REM sleep behaviour disorder                            | G7.52, F51.8                       |                                                            |
| Transient ischaemic attacks                             | G45                                |                                                            |
| Delirium                                                | F05                                |                                                            |
| <b><i>Propensity score matched diagnoses</i></b>        |                                    |                                                            |
| Ischaemic heart disease                                 | I20-I25                            |                                                            |
| Other forms of heart disease                            | I30-I52                            | I48 (Atrial fibrillation and flutter), I50 (heart failure) |
| Diabetes mellitus                                       | E08-E13                            |                                                            |
| Mood disorder                                           | F30-F39                            |                                                            |
| Psychotic disorders                                     | F20-F29                            |                                                            |
| Nicotine dependence                                     | F17                                |                                                            |
| Alcohol use disorder                                    | F10                                |                                                            |
| Epilepsy                                                | G40                                |                                                            |
| Migraine                                                | G43                                |                                                            |
| Intracranial injury with loss of consciousness          | S06                                |                                                            |
| <b><i>Negative control outcomes</i></b>                 |                                    |                                                            |
| Benign colonic polyp                                    | D12.0                              |                                                            |
| Cutaneous abscess                                       | L02                                |                                                            |
| Ganglion                                                | M67.4                              |                                                            |
| Hallux valgus (acquired)                                | M20.1                              |                                                            |
| Hernia                                                  | K40-K46                            |                                                            |
| Ingrowing nail                                          | L60.0                              |                                                            |
| Onycholysis                                             | L60.1                              |                                                            |
| Otalgia                                                 | H92.09                             |                                                            |
| Sebaceous cyst                                          | L72.3                              |                                                            |
| Senile keratosis                                        | L82.1                              |                                                            |
| Trigger finger                                          | M65.3                              |                                                            |
| Viral warts                                             | B07                                |                                                            |

**Supplementary Table 2. Unmatched cohorts: baseline characteristics**

|                                                       | CCBs vs diuretics         |                           |                  | CCBs vs RAS agents |                   |            | CCBs vs beta-blockers    |                          |                  |
|-------------------------------------------------------|---------------------------|---------------------------|------------------|--------------------|-------------------|------------|--------------------------|--------------------------|------------------|
| <i>Baseline characteristics</i>                       | <i>CCBs</i>               | <i>Diuretics</i>          | <i>SD</i>        | <i>CCBs</i>        | <i>RAS agents</i> | <i>SD</i>  | <i>CCBs</i>              | <i>Beta-blockers</i>     | <i>SD</i>        |
| Cohort size                                           | 233,860                   | 604,411                   |                  | 183,721            | 768,950           |            | 276,939                  | 573,303                  |                  |
| Age at index (y)                                      | 63.4 (10.9)               | 61.7 (11.0)               | 0.15             | 64.0 (11.5)        | 61.2 (10.5)       | 0.26       | 62.6 (10.8)              | 63.0 (11.1)              | 0.04             |
| Sex (M:F)                                             | 50%: 50%                  | 39%:61%                   | 0.22             | 41%: 59%           | 50%: 50%          | 0.17       | 45%:55%                  | 50%:50%                  | 0.09             |
| Race (W, B/AA, O/NK) <sup>a</sup>                     | 64%, 20%, 16%             | 74%, 15%, 11%             | 0.21             | 63%, 24%, 13%      | 76%, 11%, 13%     | 0.28       | 62%, 25%, 13%            | 78%, 9%, 13%             | 0.42             |
| Systolic BP <sup>b</sup>                              | 137 (21)                  | 132 (20)                  | 0.24             | 135 (22)           | 134 (20)          | 0.09       | 139 (20)                 | 128 (21)                 | 0.52             |
| Diastolic BP <sup>b</sup>                             | 79 (13)                   | 77 (13)                   | 0.13             | 78 (14)            | 78 (13)           | 0.05       | 80 (13)                  | 74 (13)                  | 0.46             |
| BMI <sup>b</sup>                                      | 29 (6)                    | 32 (8)                    | 0.43             | 29 (7)             | 31 (7)            | 0.29       | 30.4 (7.0)               | 30.3 (7.1)               | 0.02             |
| Diabetes mellitus                                     | 15%                       | 17%                       | 0.06             | 10%                | 21%               | 0.31       | 16%                      | 17%                      | 0.01             |
| Previous exposure to AHTs <sup>c</sup>                | 29% ACEI, 15% ARB, 30% BB | 34% ACEI, 19% ARB, 32% BB | 0.11, 0.12, 0.06 | 33% BB, 29% D      | 30% BB, 40% D     | 0.08, 0.23 | 36% D, 32% ACEI, 20% ARB | 33% D, 27% ACEI, 12% ARB | 0.06, 0.10, 0.21 |
| Data density (average facts per patient) <sup>d</sup> | 8,188                     | 10,375                    |                  | 9,478              | 8,955             |            | 9,942                    | 9,345                    |                  |

SD: standard difference.

<sup>a</sup>W: white. B/AA: black or African American. O/NK: other or not known.

<sup>b</sup>Most recent value before exposure period. BP: blood pressure.

<sup>c</sup>ACEI: angiotensin converting enzyme inhibitors. ARB: angiotensin II inhibitors. BB: beta-blockers. D: diuretics.

<sup>d</sup>Comprising diagnoses, procedures, medications, lab results, and vital signs.

**Supplementary Table 3: Matched cohort characteristics and outcomes over a 2 year period associated with CCBs compared to diuretics, RAS agents, and beta-blockers**

|                                        | CCBs vs diuretics         |                            | CCBs vs RAS agents        |                            | CCBs vs beta-blockers        |                            |
|----------------------------------------|---------------------------|----------------------------|---------------------------|----------------------------|------------------------------|----------------------------|
| <b>Baseline characteristics</b>        |                           |                            |                           |                            |                              |                            |
|                                        | <i>CCBs</i>               | <i>Diuretics</i>           | <i>CCBs</i>               | <i>RAS agents</i>          | <i>CCBs</i>                  | <i>Beta-blockers</i>       |
| Cohort size                            | 231,764                   | 231,764                    | 181,495                   | 181,495                    | 234,015                      | 234,015                    |
| Age at index (y)                       | 63.3 (10.9)               | 63.5 (11.1)                | 63.9 (11.4)               | 64.0 (11.4)                | 62.9 (10.8)                  | 63.1 (11.0)                |
| Sex (M:F)                              | 50%:50%                   | 49%:51%                    | 41%:59%                   | 41%:59%                    | 44%:56%                      | 45%:55%                    |
| Race (W, B/AA, O/NK) <sup>a</sup>      | 65%, 20%, 15%             | 66%, 18%, 16%              | 64%, 23%, 13%             | 64%, 23%, 13%              | 69%, 17%, 14%                | 70%, 17%, 13%              |
| Systolic BP <sup>b</sup>               | 137 (21)                  | 135 (21)                   | 135 (21.7)                | 134 (20.7)                 | 137 (20) <sup>d</sup>        | 134 (20) <sup>d</sup>      |
| Diastolic BP <sup>b</sup>              | 79 (13)                   | 78 (13)                    | 78 (14)                   | 78 (13)                    | 79 (13) <sup>e</sup>         | 78 (13) <sup>e</sup>       |
| BMI <sup>b</sup>                       | 29 (6)                    | 30 (7)                     | 29 (7)                    | 29 (7)                     | 30 (7)                       | 31 (7)                     |
| Diabetes mellitus                      | 15%                       | 16%                        | 10%                       | 10%                        | 16%                          | 16%                        |
| Previous exposure to AHTs <sup>c</sup> | 29% ACEI, 15% ARB, 30% BB | 30% ACEI, 14% ARB, 30% BB  | 33% BB, 29% D             | 34% BB, 29% D              | 35% D, 30%, 18% ARB          | 35% D, 30% ACEI, 18% ARB   |
| <b>Outcomes</b>                        |                           |                            |                           |                            |                              |                            |
|                                        | <i>CCBs vs diuretics</i>  | <i>Odds ratio (95% CI)</i> | <i>CCBs vs RAS agents</i> | <i>Odds ratio (95% CI)</i> | <i>CCBs vs beta-blockers</i> | <i>Odds ratio (95% CI)</i> |
| Dementia                               | 1.2% vs 1.0%              | <b>1.19 (1.13-1.26)</b>    | 1.4% vs 1.1%              | <b>1.24 (1.17-1.32)</b>    | 1.0% vs 1.1%                 | 0.96 (0.90-1.01)           |
| Alzheimer's disease                    | 0.40% vs 0.29%            | <b>1.39 (1.26-1.53)</b>    | 0.43% vs 0.40%            | 1.08 (0.91-1.20)           | 0.36% vs 0.35%               | 1.05 (0.96-1.16)           |
| Vascular dementia                      | 0.18% vs 0.11%            | <b>1.54 (1.32-1.79)</b>    | 0.19% vs 0.15%            | <b>1.26 (1.08-1.48)</b>    | 0.15% vs 0.14%               | 1.04 (0.90-1.21)           |
| Other dementias                        | 1.0% vs 0.89%             | <b>1.14 (1.08-1.21)</b>    | 1.2% vs 1.0%              | <b>1.26 (1.19-1.34)</b>    | 0.87% vs 0.91%               | 0.96 (0.90-1.02)           |
| MCI                                    | 0.48% vs 0.38%            | <b>1.26 (1.15-1.38)</b>    | 0.52% vs 0.43%            | <b>1.21 (1.10-1.33)</b>    | 0.44% vs 0.40%               | <b>1.11 (1.02-1.22)</b>    |
| Movement disorders                     | 1.8% vs 1.9%              | <b>0.92 (0.88-0.96)</b>    | 2.0% vs 1.6%              | <b>1.21 (1.16-1.28)</b>    | 1.6% vs 2.2%                 | <b>0.73 (0.70-0.76)</b>    |
| Parkinson's disease                    | 0.34% vs 0.34%            | 1.01 (0.91-1.13)           | 0.35% vs 0.33%            | 1.06 (0.95-1.19)           | 0.28% vs 0.39%               | <b>0.73 (0.66-0.81)</b>    |
| Cerebrovascular disease                | 4.5% vs 3.9%              | <b>1.17 (1.14-1.21)</b>    | 4.9% vs 3.7%              | <b>1.34 (1.29-1.38)</b>    | 3.7% vs 4.3%                 | <b>0.86 (0.84-0.89)</b>    |
| Stroke                                 | 1.6% vs 1.3%              | <b>1.25 (1.19-1.31)</b>    | 1.6% vs 1.2%              | <b>1.40 (1.33-1.48)</b>    | 1.2% vs 1.4%                 | <b>0.87 (0.82-0.91)</b>    |
| Cerebral haemorrhage                   | 0.33% vs 0.27%            | <b>1.25 (1.13-1.39)</b>    | 0.40% vs 0.23%            | <b>1.77 (1.56-1.99)</b>    | 0.25% vs 0.33%               | <b>0.77 (0.69-0.86)</b>    |
| Any of the above                       | 7.6% vs 6.8%              | <b>1.12 (1.10-1.15)</b>    | 8.3% vs 6.5%              | <b>1.29 (1.26-1.32)</b>    | 6.6% vs 7.6%                 | <b>0.85 (0.83-0.87)</b>    |
| Negative control outcomes <sup>f</sup> |                           | <b>0.89 (0.84-0.93)</b>    |                           | 1.04 (0.97-1.11)           |                              | 1.06 (1.00-1.13)           |
| Most recent systolic BP                | 133 (17) vs 130 (18)      |                            | 132 (18) vs 131 (18)      |                            | 133 (17) vs 131 (18.2)       |                            |
| Most recent diastolic BP               | 76 (11) vs 75 (11)        |                            | 76 (11) vs 76 (11)        |                            | 77 (11) vs 76 (11)           |                            |

<sup>a</sup>W: white. B/AA: black or African American. O/NK: other or not known.

<sup>b</sup>Most recent value before exposure period.

<sup>c</sup>ACEI: angiotensin converting enzyme inhibitors. ARB: angiotensin II inhibitors. BB: beta-blockers. D: diuretics.

<sup>d</sup>Standard difference = 0.16.

<sup>e</sup>Standard difference = 0.12.

<sup>f</sup>Mean of 12 negative control outcomes.
